# Supplementary material
Source: publisher figshare collection journal article supplement (https://acs.figshare.com/ndownloader/files/4431667)
Supplement: Supplementary file 1 [file 4431667]

## Supporting Information

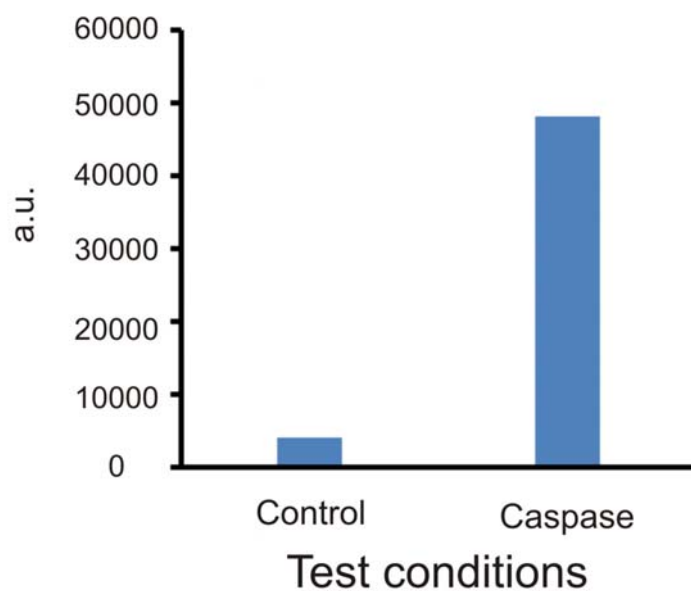

**Figure S1: Caspase-3 assay for monolayers of Caco-2 cells that were incubated with the 20<sub>carb</sub> particles for 16 hrs in growth medium and controls in normal growth medium. The control experiment verifies significantly higher caspase-3 activity in cells exposed to the nanoparticles.**

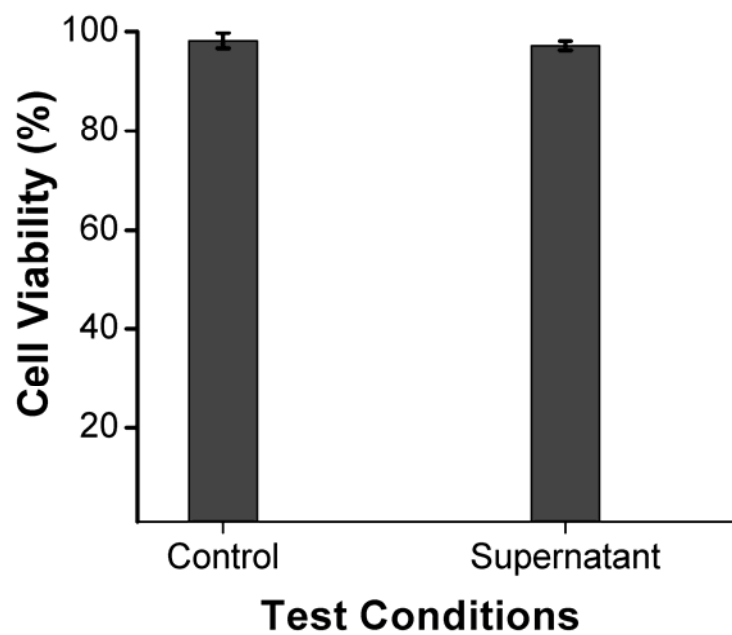

**Figure S2: Cell viability for Caco-2 monolayers that were incubated with the supernatant from PS nanoparticles (see text) in growth medium for 16 hours and controls in normal growth medium. The impact of dyes that are potentially leaching out of the nanoparticles is negligible.**
